# Supplementary material for: Human papilloma virus E7 oncoprotein abrogates the p53-p21-DREAM pathway
Source: PubMed Central journal article supplement (PMC5453983; doi:10.1038/s41598-017-02831-9), 2017-06-01

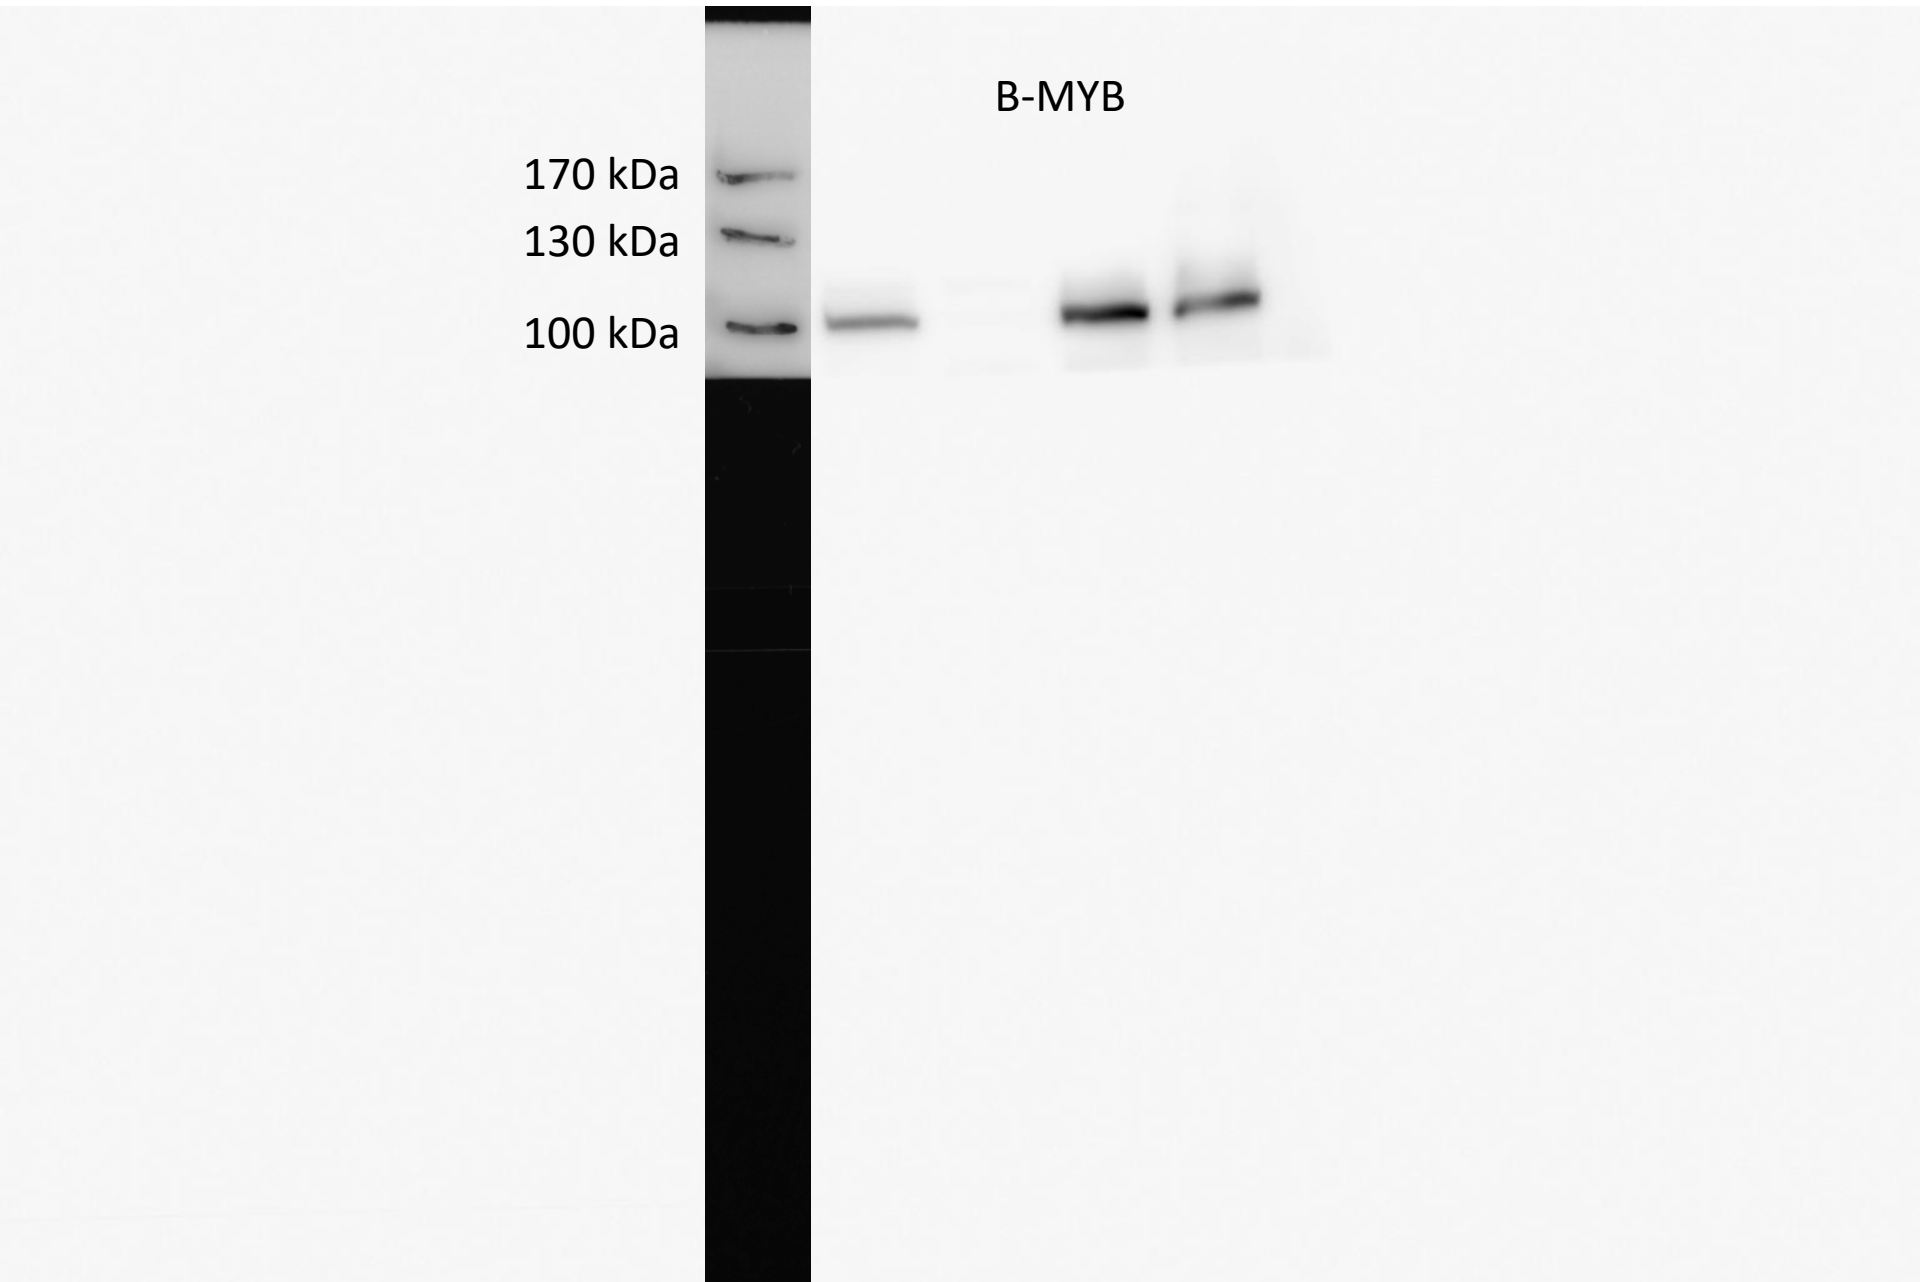

70 kDa

55 kDa

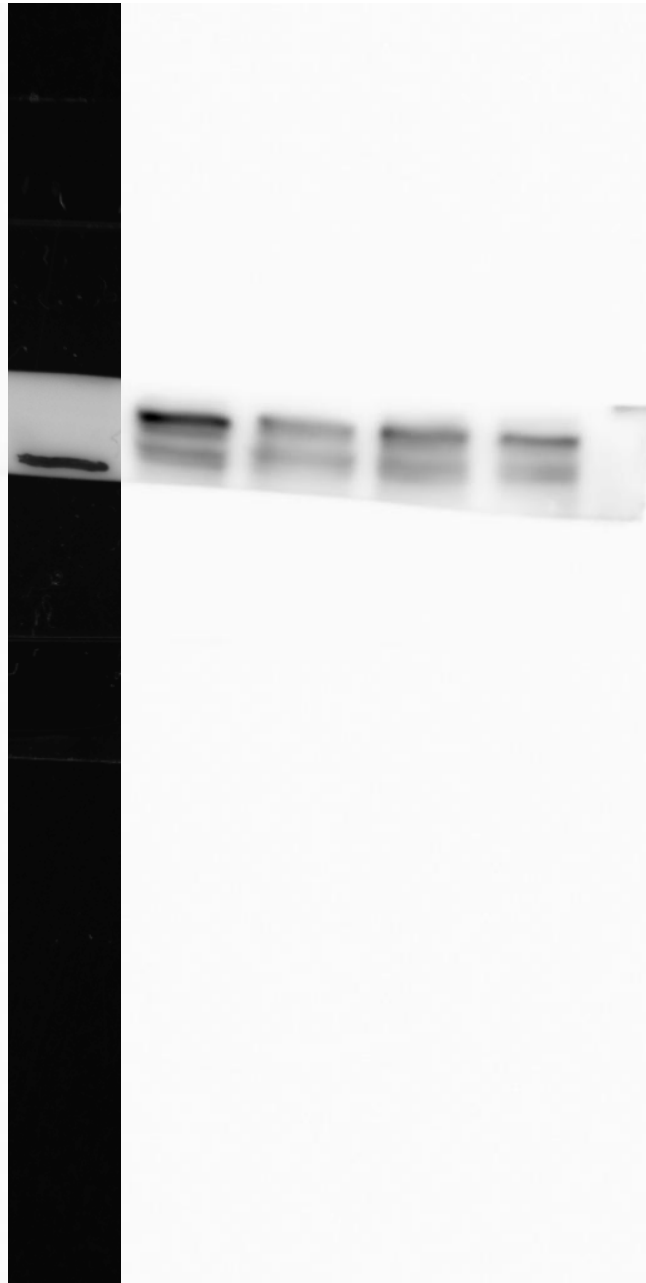

E2F1

170 kDa

130 kDa

100 kDa

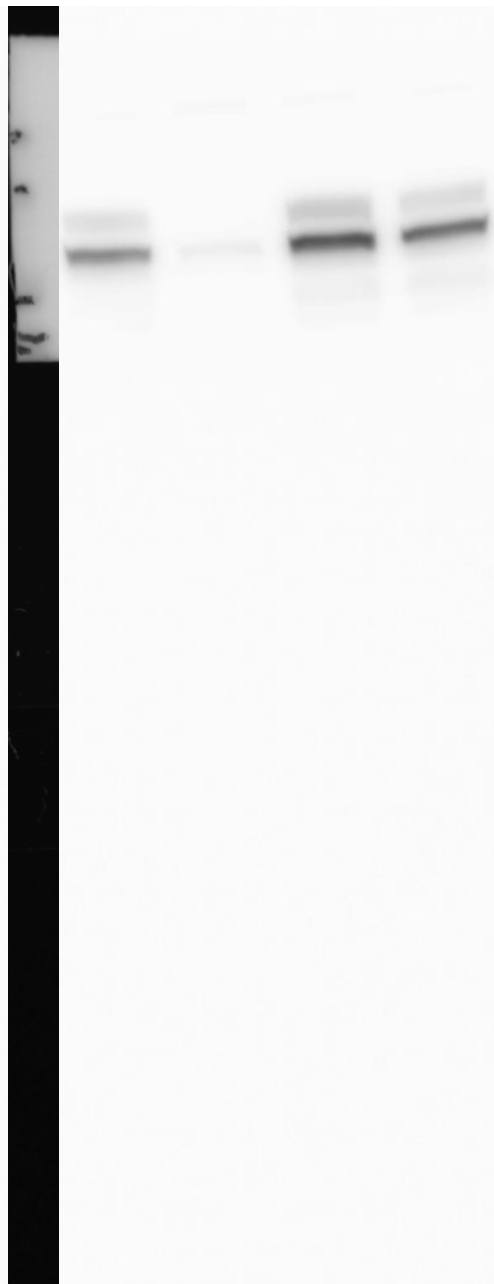

KIF23

70 kDa

55 kDa

40 kDa

35 kDa

25 kDa

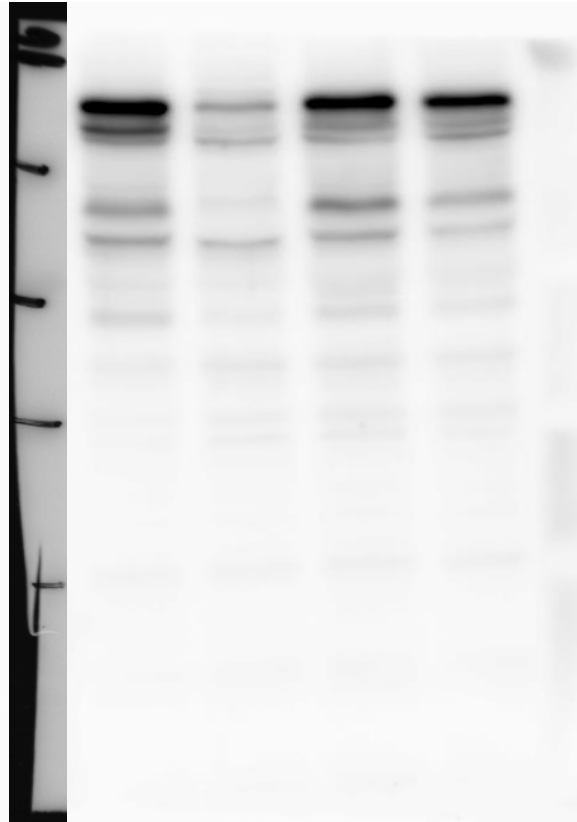

CDC25C

40 kDa

35 kDa

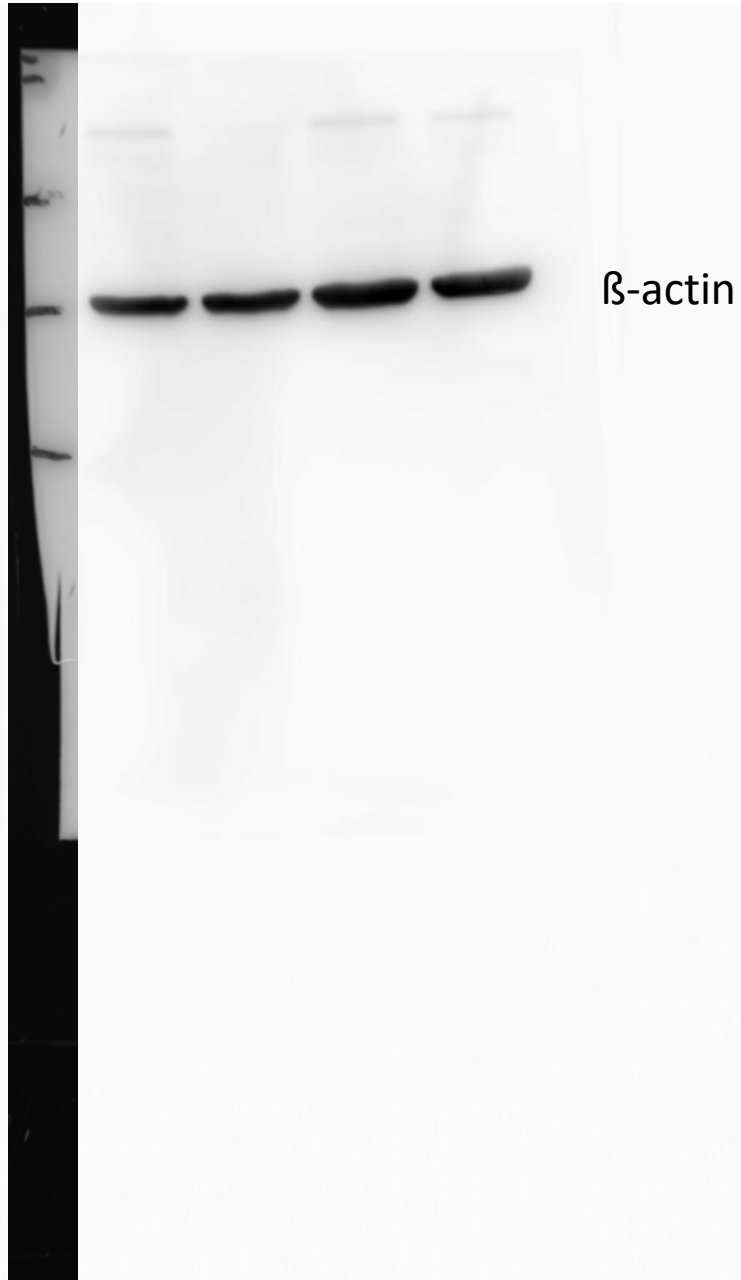

Supplement: 41598_2017_2831_MOESM1_ESM.pdf [file 41598_2017_2831_MOESM1_ESM.pdf]
